1 **The neuropeptide Drosulfakinin regulates social isolation-induced**  
2 **aggression in *Drosophila***

3 Pavan Agrawal<sup>1</sup>, Damian Kao, Phuong Chung, Loren L. Looger

4 Janelia Research Campus, Howard Hughes Medical Institute, Ashburn, VA, USA

5 <sup>1</sup>Correspondence: [pavan.janelia@gmail.com](mailto:pavan.janelia@gmail.com)

6

7

**ABSTRACT**

8 Social isolation strongly modulates behavior across the animal kingdom. We utilized the fruit fly  
9 *Drosophila melanogaster* to study social isolation-driven changes in animal behavior and gene  
10 expression in the brain. RNA-seq identified several head-expressed genes strongly responding to social  
11 isolation or enrichment. Of particular interest, social isolation downregulated expression of the gene  
12 encoding the neuropeptide *Drosulfakinin* (*Dsk*), the homologue of vertebrate cholecystinin (CCK),  
13 which is critical for many mammalian social behaviors. *Dsk* knockdown significantly increased social  
14 isolation-induced aggression. Genetic activation or silencing of *Dsk* neurons each similarly increased  
15 isolation-driven aggression. Our results suggest a U-shaped dependence of social isolation-induced  
16 aggressive behavior on *Dsk* signaling, similar to the actions of many neuromodulators in other contexts.

17

18

19

## Dsk mediated *Drosophila* aggression

20 **Data availability:** The raw sequence data from RNA-seq experiments has been deposited into the  
21 Sequence Read Archive (<https://www.ncbi.nlm.nih.gov/sra>) with accession number: PRJNA481582.

22 Supplementary files and figures accompany this article.

23

### 24 **Running title**

25 Dsk-mediated *Drosophila* aggression

26

### 27 **KEYWORDS**

28 *Drosophila melanogaster*, Social isolation, Aggression, Neuropeptide, Drosulfakinin, Cholecystokinin

29

### 30 **Corresponding author**

31 Pavan Agrawal

32 Howard Hughes Medical Institute, Janelia Research Campus

33 19700 Helix Drive

34 Ashburn, VA 20147

35 USA

36 Phone: +1 571 209 4000 (ext. 3208)

37 Email: [pavan.janelia@gmail.com](mailto:pavan.janelia@gmail.com)

38

39

## INTRODUCTION

40 Social isolation is a passive stressor that profoundly influences the behavior of social animals  
41 (Grippe et al., 2007; Hall et al., 1998; Wallace et al., 2009). Social isolation increases aggression in  
42 humans (Ferguson et al., 2005), rodents (Luciano and Lore, 1975; Ma et al., 2011; Wallace et al., 2009),  
43 and fruit flies (Hoffmann, 1989; Wang et al., 2008).

44 *Drosophila melanogaster* has been a successful model system for identifying the neural  
45 substrates of aggressive behavior (Asahina, 2017; Baier et al., 2002; Chen et al., 2002; Kravitz and  
46 Huber, 2003). Several conserved neuromodulators have been identified as key players in regulating  
47 aggression, including biogenic amines such as dopamine (Alekseyenko et al., 2013; Kayser et al., 2015),  
48 octopamine (Certel et al., 2007; Hoyer et al., 2008; Kayser et al., 2015; Williams et al., 2014; Zhou et  
49 al., 2008), and serotonin (Alekseyenko et al., 2010, 2014; Dierick and Greenspan, 2007); and  
50 neuropeptides including neuropeptide F (NPF; Asahina et al., 2014; Dierick and Greenspan, 2007) and  
51 tachykinin (Asahina et al., 2014). The associated receptors (Asahina et al., 2014) and neural circuits have  
52 been identified in some cases (Koganezawa et al., 2016).

53 Flies display aggression in a variety of settings, including male-male competition for females,  
54 territorial disputes, etc. (Asahina, 2017; Dow and Schilcher, 1975; Hoffmann, 1987; Jacobs, 1960;  
55 Kravitz and Fernandez, 2015). In this study, we sought to elucidate the circuit and genetic underpinnings  
56 of male aggression induced by deprivation of social interactions. Using an RNA-seq screen, we identified  
57 several candidate genes, most notably the neuropeptide Drosulfakinin (Dsk) (Chen and Ganetzky, 2012;  
58 Chen et al., 2012; Nichols et al., 1988; Söderberg et al., 2012), the homologue of the vertebrate  
59 cholecystokinin (CCK). CCK is well documented as a critical modulator of anxiety and aggression in a  
60 number of settings (Katsouni et al., 2013; Li et al., 2007; Panksepp et al., 2004; Vasar et al., 1993;

61 Zwanzger et al., 2012). Dsk has been reported to modulate aggression in *Drosophila* (Williams et al.,  
62 2014), but many mechanistic details are lacking.

63 Here we use modulation of group size and isolation duration, RNA-seq, RNA interference  
64 (RNAi), and genetic activation or silencing of target neural populations to further elucidate the  
65 involvement of Dsk in aggressive behavior.

66

67

## RESULTS

### 68 **Social isolation induces transcriptional changes in male *Drosophila* heads**

69 To probe the molecular mechanisms involved in regulating social isolation-induced behaviors, we  
70 performed RNA-seq on male flies that were housed either individually (single-housed, SH) or in groups  
71 of 20 (group-housed, GH) for four days in vials containing standard fly food. Flies were flash-frozen,  
72 whole heads isolated, RNA prepared and sequenced (N=2 biological replicates) (**Figure 1A**). Both SH  
73 and GH flies showed strong inter-replicate concordance:  $r = 0.964$  and  $0.965$ , respectively  
74 (**Supplementary Figure S1A,B**). Commonly used RNA-seq analysis methods utilize diverse models for  
75 dispersion, normalization and differentially-expressed gene (DEG) calling. To increase stringency of our  
76 DEG calling, we utilized three separate techniques, DESeq2 (Love et al., 2014), edgeR (Robinson et al.,  
77 2010), and EBseq (Leng et al., 2013), and compared their results (**Material and Methods**). We focused  
78 on genes identified by all three methods, which we considered to be robust hits.

79 Using stringent criteria for differential expression, *i.e.* fold-change  $\geq 2$  and false discovery rate  $\leq$   
80 0.05 (**Figure 1B, Supplementary Table S1**), 90 genes were selected by at least one method, and 25 by  
81 all three (**Table 1**). Most DEGs were related to the immune response (**Table 1, Supplementary Tables**  
82 **S1, S2**), which is consistent with the observation that social isolation leads to immune upregulation across

## Dsk mediated *Drosophila* aggression

83 the animal kingdom (Cole et al., 2015; Ellen et al., 2004; Powell et al., 2013). Many of these immune-  
84 related genes are commonly seen as DEGs in fly microarray and RNA-seq experiments (Carney, 2007;  
85 Ellis and Carney, 2011; Mohorianu et al., 2017; Wang et al., 2008) (**Supplementary Table S3**). We  
86 compared 90 social isolation-induced DEGs in whole fly heads with similar data generated specifically  
87 from FACS-purified dopaminergic neurons (Agrawal et al., 2019). Depending on the particular method  
88 used to identify DEGs, we found between 3 to 9 genes common between these two datasets, suggesting  
89 that social isolation regulates somewhat different set of genes in whole heads relative to dopaminergic  
90 neurons (**Supplementary Table S3**). Along these lines, perturbation of neural activity stimulates  
91 expression of distinct sets of genes in whole brain *versus* dopaminergic neurons (Chen et al., 2016).

92 In our data, very few (7 down-regulated, 4 up-regulated) not-obviously-immune transcripts were  
93 identified by all three RNA-seq analysis methods as being significantly modulated by social experience  
94 (**Table1, Supplementary Table S1**). Examples of genes down-regulated in SH males include the male-  
95 specific odorant-binding protein *Obp99b* (Anholt et al., 2003), hydroxysteroid dehydrogenase *CG6012*,  
96 and the neuropeptide *Drosulfakinin* (*Dsk*) (**Figure 1B, Table1**). Genes upregulated in SH males included  
97 the sensory cilium structural protein *Artichoke* (*Atk*), cathepsin-like protease *CG11459*, long non-coding  
98 RNA *CR44404*, and secreted peptide *CG43175* (**Table1**). Several of these transcripts have been  
99 identified in previous studies (**Supplementary Table S3**), albeit under different conditions (*e.g.*  
100 courtship, social defeat) (Barajas-Azpeleta et al., 2018; Carney, 2007; Ellis and Carney, 2011; Mohorianu  
101 et al., 2017; Wang et al., 2008) or by different techniques (*e.g.* microarray, RNA-seq). Of these  
102 stringently selected transcripts, only *Dsk* is central nervous system-specific and was selected for further  
103 study. *Dsk* expression differences were validated with qPCR on head-extracted RNA isolated from SH  
104 and GH males (**Supplementary Figure S2A**).

Dsk mediated *Drosophila* aggression

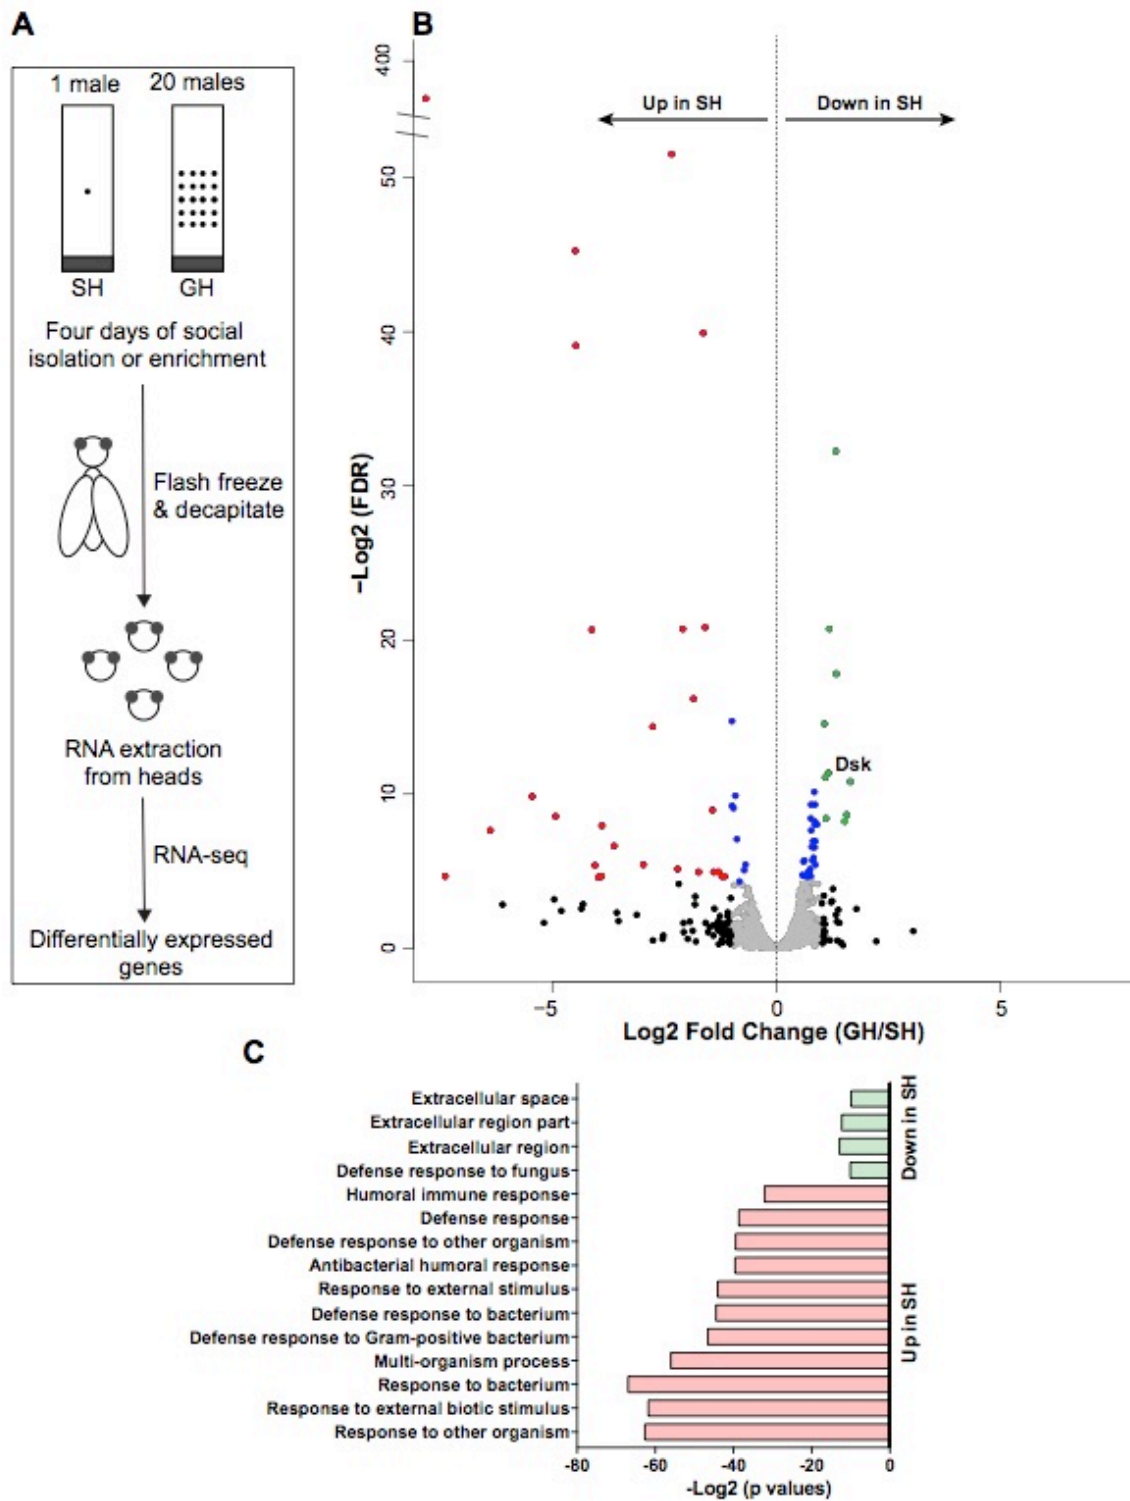

105

106 **Figure 1. Transcriptional differences in male heads after single housing (SH) or group housing (GH).** (A)

107 Outline of the experimental paradigm. (B) Volcano plot of RNA-seq profile using DESeq2 for individual genes.

Dsk mediated *Drosophila* aggression

108 Gray: FC<2; black: FC>2; blue: P<0.05; green: P <0.05 and +FC>2, red: P <0.05 and -FC>2; FC = fold change.

109 (C) Enriched Gene Ontology categories for differentially-expressed genes obtained from DEseq2 analysis.

| <b>Genes down-regulated in response to social isolation</b> |                    |               |              |              |                                             |
|-------------------------------------------------------------|--------------------|---------------|--------------|--------------|---------------------------------------------|
| <b>Flybase Gene ID</b>                                      | <b>Gene symbol</b> | <b>DESeq2</b> | <b>edgeR</b> | <b>EBseq</b> | <b>Annotation/known/predicted function</b>  |
| FBgn0039685                                                 | Obp99b             | Down          | Down         | Down         | sensory perception of chemical stimulus     |
| FBgn0000500                                                 | Dsk                | Down          | Down         | Down         | neuropeptide                                |
| FBgn0032615                                                 | CG6012             | Down          | Down         | Down         | hydroxysteroid dehydrogenase                |
| FBgn0036589                                                 | CG13067            | Down          | Down         | Down         | cuticle protein                             |
| FBgn0030398                                                 | Cpr11B             | Down          | Down         | Down         | cuticle protein                             |
| FBgn0032507                                                 | CG9377             | Down          | Down         | Down         | epithelial protease                         |
| FBgn0040629                                                 | CG18673            | Down          | Down         | Down         | carbonic anhydrase 2                        |
| FBgn0052282                                                 | Drsl4              | Down          | Down         | Down         | antifungal peptide                          |
| FBgn0035434                                                 | Drsl5              | Down          | Down         | Down         | antifungal peptide                          |
| <b>Genes up-regulated in response to social isolation</b>   |                    |               |              |              |                                             |
| FBgn0000278                                                 | CecB               | Up            | Up           | Up           | antibacterial humoral response              |
| FBgn0005660                                                 | Ets21C             | Up            | Up           | Up           | defense response to bacterium               |
| FBgn0032638                                                 | SPH93              | Up            | Up           | Up           | defense response to Gram-positive bacterium |
| FBgn0032639                                                 | CG18563            | Up            | Up           | Up           | epithelial protease                         |
| FBgn0265577                                                 | CR44404            | Up            | Up           | Up           | long non-coding RNA                         |
| FBgn0014865                                                 | Mtk                | Up            | Up           | Up           | antifungal peptide                          |
| FBgn0036995                                                 | Atk                | Up            | Up           | Up           | sensory cilium structural protein           |
| FBgn0038299                                                 | Spn88Eb            | Up            | Up           | Up           | fungal-induced protease inhibitor           |
| FBgn0052185                                                 | Edin               | Up            | Up           | Up           | defense response to Gram-negative bacteria  |
| FBgn0037396                                                 | CG11459            | Up            | Up           | Up           | cathepsin-like protease                     |
| FBgn0010381                                                 | Drs                | Up            | Up           | Up           | antifungal peptide                          |
| FBgn0043578                                                 | PGRP-SB1           | Up            | Up           | Up           | innate immune response                      |
| FBgn0010388                                                 | Dro                | Up            | Up           | Up           | antibacterial peptide                       |
| FBgn0039593                                                 | Sid                | Up            | Up           | Up           | response to bacterium                       |
| FBgn0262794                                                 | CG43175            | Up            | Up           | Up           | unannotated secreted peptide                |
| FBgn0044812                                                 | TotC               | Up            | Up           | Up           | response to bacterium                       |

110

## Dsk mediated *Drosophila* aggression

111 **Table 1.** Genes identified as differentially expressed upon social isolation by three different RNA-seq analysis  
112 methods. The last column shows gene function from Flybase, or predicted from Pfam (<http://pfam.xfam.org>)  
113 classification or annotation of homologues in other species if not annotated in Flybase. A complete list of genes  
114 and GO analysis is included in Supplementary Tables S1 and S2.

### 115 ***Dsk* knock-down affects social isolation-induced aggression**

116 As CCK is known to regulate aggression, anxiety, and social-defeat responses in rodents (Katsouni et  
117 al., 2013; Li et al., 2007; Panksepp et al., 2004; Vasar et al., 1993; Zwanzger et al., 2012), we next tested  
118 specific phenotypic effects of *Dsk* modulation. *Dsk* localizes to the pars intercerebralis, parts of the  
119 protocerebrum and the sub-esophageal ganglion (Nichols, 1992; Nichols and Lim, 1996; Söderberg et  
120 al., 2012). In the pars intercerebralis, *Dsk* is expressed in the insulin-like peptide *Dilp2*-producing  
121 neurons (Söderberg et al., 2012). Faithful *GAL4* driver lines are available for both *Dsk* (Asahina et al.,  
122 2014) and *Dilp2* (Rulifson, 2002) (**Figure 2A, B**). To quantify aggression, we counted lunges using the  
123 software package CADABRA (Dankert et al., 2009). Lunging, *i.e.* a fly rearing on its hind legs and  
124 snapping downward on its opponent, is a prominent aggressive behavior in *Drosophila* males (Hoffmann,  
125 1987; Hoyer et al., 2008; Nilsen et al., 2004). Knockdown of *Dsk* in *Dsk-GAL4* neurons using RNA  
126 interference (RNAi) significantly increased lunges in SH flies relative to controls without RNAi insert  
127 (**Figure 2C**). Similar effects were observed upon *Dsk* knock-down using the *Dilp2-GAL4* driver (**Figure**  
128 **2E**). Successful knockdown using pan-neuronal *elav-GAL4<sup>c155</sup>* was confirmed by qRT-PCR  
129 (**Supplementary Figure S2B**). Thus, lowering *Dsk* expression in the pars intercerebralis increased  
130 aggressive lunging following social isolation.

131 It was previously suggested that aggressive behaviors should be normalized to overall locomotor  
132 activity (Hoyer et al., 2008). Isolated wild-type flies sleep less and show greater levels of overall daytime  
133 activity (Ganguly-Fitzgerald et al., 2006) than GH flies. In contrast, isolated *Dsk*-knockdown flies show



## Dsk mediated *Drosophila* aggression

134 significantly reduced overall daytime activity (**Figure 2D, F**; for *Dsk-GAL4* and *Dilp2-GAL4*,  
135 respectively), with no effect in GH flies (**Supplementary Figure S3**). Thus, the observed increase in  
136 aggression in SH males upon *Dsk* knockdown arises despite decreased overall activity.

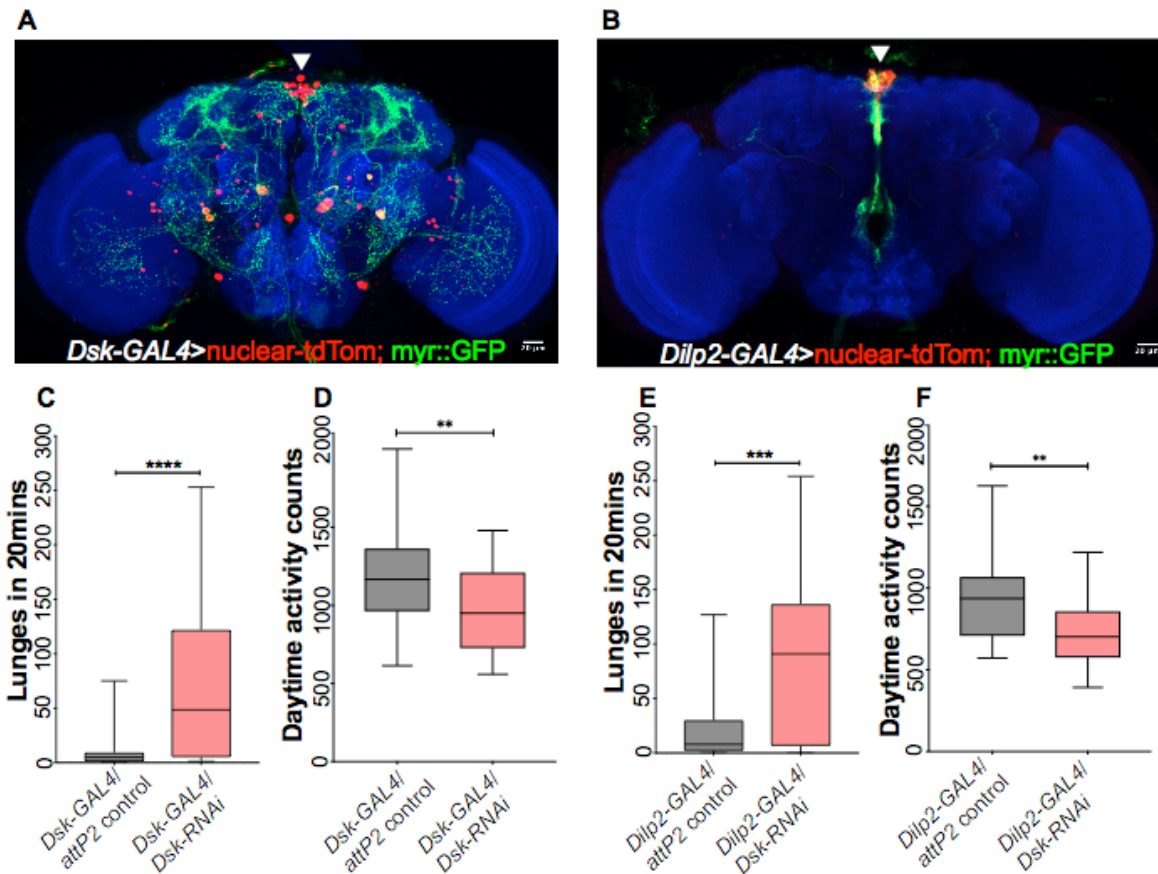

138 **Figure 2. *Dsk* knockdown increases social isolation-induced aggression independently of overall activity**  
139 **levels.** *Dsk* levels were reduced by driving the expression of *UAS-Dsk-RNAi* with *Dsk-GAL4* or *Dilp2-GAL4*.  
140 These drivers overlap in the pars intercerebralis region (white arrowhead, A and B). RNAi-mediated *Dsk*  
141 knockdown increased aggression in SH flies relative to the *attP2* background controls without RNAi insert (C,  
142 *Dsk-GAL4*,  $P < 0.0001$ ,  $N = 38$ ; E, *Dilp2-GAL4*,  $P = 0.0004$ ,  $N = 26$ ; Mann-Whitney U-test). *Dsk* knockdown  
143 significantly reduced the overall daytime activity of SH males (D, *Dsk-GAL4*,  $P = 0.004$ ,  $N = 32$ ; F, *Dilp2-GAL4*,  
144  $P = 0.002$ ,  $N = 32$ ; Student's t-test).

145 In *Drosophila*, Dsk has two receptors, CCK-like receptor (CCKLR)-17D1 and CCKLR-17D3  
146 (Kubiak et al., 2002). Signaling through CCKLR-17D1, but not CCKLR-17D3, is responsible for larval  
147 neuromuscular junction growth and muscle contraction (Chen and Ganetzky, 2012; Chen et al., 2012).  
148 Since *GAL4* driver reagents are not available for several neuropeptide receptors, we used a MiMiC  
149 reporter line (Nagarkar-Jaiswal et al., 2015) available for *CCKLR-17D1* (**Material and Methods**) to  
150 ascertain its expression in the brain. We found reporter expression in several brains regions including in  
151 the pars intercerebralis (PI), which overlapped with *Dilp2* expression (**Supplementary Figure S4A-C,**  
152 **A'-C'**). Successful knockdown for both *CCKLR-17D1* and *CCKLR-17D3* was confirmed using *elav-*  
153 *GAL4<sup>el55</sup>* by qRT-PCR (**Supplementary Figure S4D**). However, in *Dsk-GAL4* or *Dilp2-GAL4* flies,  
154 knockdown of *CCKLR-17D1*, but not *CCKLR-17D3*, increased aggression of SH flies (**Supplementary**  
155 **Figure S4E, F**). This is consistent with results for the ligand *Dsk* and suggests that signaling of Dsk  
156 through its receptor CCKLR-17D1 in PI increases isolation-driven aggression.

157

### 158 **Social isolation is essential for *Dsk*-mediated aggression**

159 To more precisely determine the interaction between social isolation and *Dsk*, we varied group  
160 size and isolation length from 1-20 flies and from 1-4 days, respectively. The presence of even a single  
161 other fly almost eliminated *Dsk* knockdown-evoked aggression, and aggression remained suppressed as  
162 group size increased (**Figure 3 A, B**). As few as 1-2 days of isolation modestly but significantly increased  
163 aggression in SH males in which *Dsk* was knocked down (**Supplementary Figure S5A, B**); the effect  
164 increased for up to 4 days.

## Dsk mediated *Drosophila* aggression

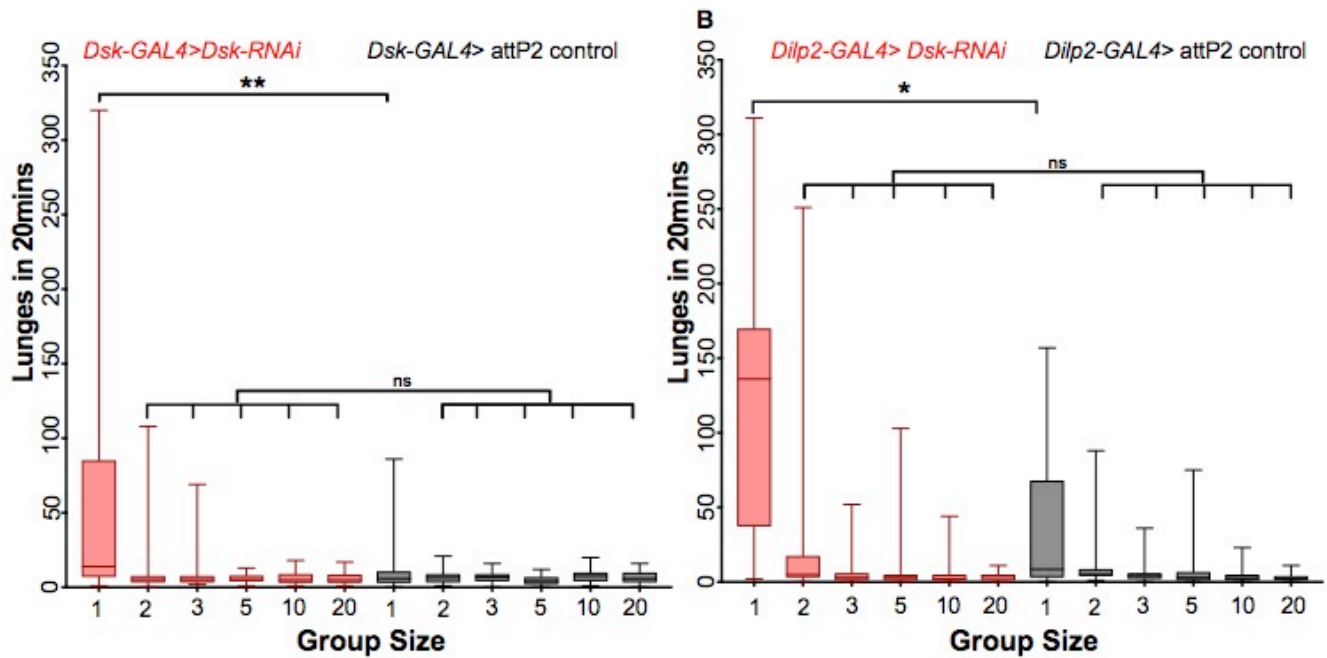

165

166 **Figure 3. Social isolation is essential for aggression mediated by *Dsk* knockdown.** (A) *Dsk-GAL4/Dsk-RNAi*  
167 vs. *Dsk-GAL4/attP2-control*, group size 1, \*\*: P=0.0037. N=33-36. (B) *Dilp2-GAL4/Dsk-RNAi* vs. *Dilp2-*  
168 *GAL4/attP2-control*, group size 1, \*: P=0.013. N=24-36. Presence of other males drastically reduced aggression  
169 as seen in group size 2 or greater. Kruskal-Wallis ANOVA with Dunn's multiple comparison test.

170

### 171 Both activation and silencing of *Dsk* neurons increase aggression

172 Having established the contribution of *Dsk* and its receptor *CCKLR-17D1* to aggression in SH  
173 males, we next explored the function of the neurosecretory cells themselves. Silencing of *Dsk* neurons  
174 with the inward rectifying potassium channel Kir2.1 (Baines et al., 2001) significantly increased lunging  
175 (**Figure 4A**), which is consistent with the involvement of *Dsk* and *CCKLR-17D1* signaling for promoting  
176 aggression in SH males. Surprisingly, genetic activation of *Dsk* neurons with the bacterial sodium  
177 channel NaChBac (Nitabach, 2006) also increased aggression (**Figure 4B**). GH flies showed very few  
178 lunges in all cases, indicating that social isolation is critical for aggression in our assays (**Figure 4 A, B**).

## Dsk mediated *Drosophila* aggression

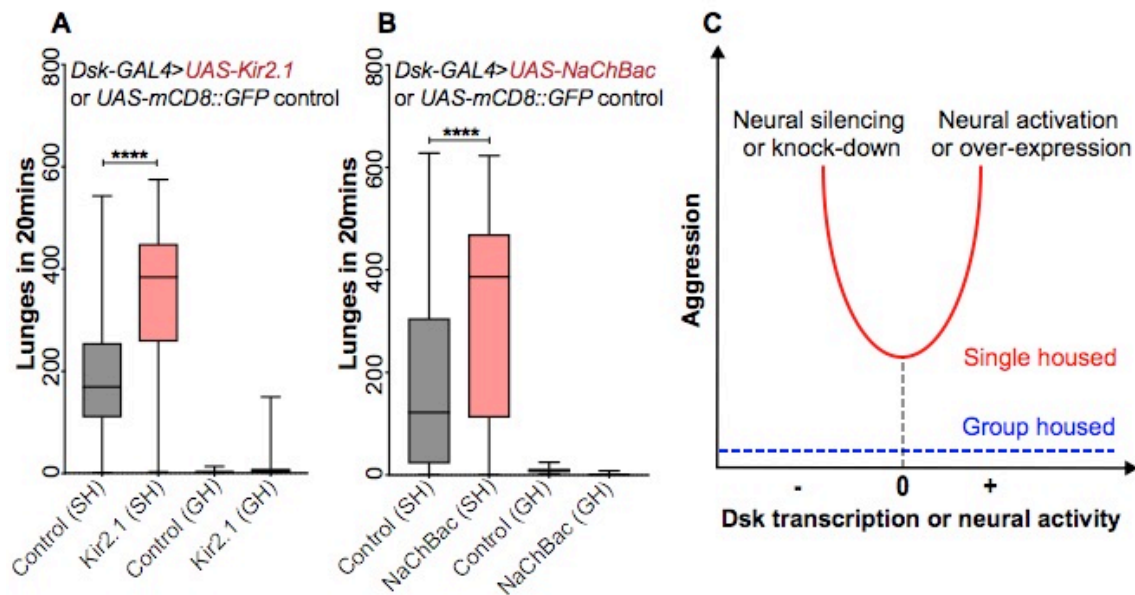

179

180 **Figure 4. Genetic activation and silencing of *Dsk* neurons both increase aggression.** (A) Silencing of *Dsk*  
181 neurons with *UAS-Kir2.1-EGFP* by *Dsk-GAL4* driver increases aggression in SH males ( $P < 0.0001$ , Mann-  
182 Whitney U-test,  $N=48$ ). (B) Activation of *Dsk* neurons with *UAS-NaChBac* by *Dsk-GAL4* driver also increases  
183 aggression in SH males ( $P < 0.0001$ , Mann-Whitney U-test,  $N=52$ ). Controls in both (A) and (B) are *UAS-*  
184 *mCD8::GFP* transgene driven by *Dsk-GAL4*. (C) Schematic of putative U-shaped effect of *Dsk* neuron activity  
185 and transcript levels on aggression.

186

187

## DISCUSSION

188 We have shown that knockdown of the neuropeptide *Dsk* or its receptor *CCKLR-17D1* in the pars  
189 intercerebralis (PI) increases social isolation-driven aggression of male flies. Moreover, *Dsk* appears to  
190 act in a U-shaped fashion (**Figure 4C**), with both knockdown (our results) and overexpression (Williams  
191 et al., 2014) increasing aggression. We also showed that *Dsk* neuronal activity follows a similar trend,  
192 with both activation and silencing increasing aggression. This suggests that the primary role of these  
193 neurons in this context is indeed production and secretion of Dsk (Söderberg et al., 2012). Transcription

## Dsk mediated *Drosophila* aggression

194 factors in the fly PI neurons regulating aggression were recently identified (Davis et al., 2014), and it  
195 was shown that activation of PI neurons increases aggression. However, the downstream neuropeptides  
196 were not known (Thomas et al., 2015). Our findings identify *Dsk* as a key neuropeptide expressed in the  
197 PI region that regulates aggression. Further work will be required to delineate the aggression-modulating  
198 functions, if any, of other neuropeptides also secreted from the PI region.

199 A recent neural activation screen (Asahina et al., 2014) explored the role of neuropeptides in  
200 aggression in *Drosophila*, but investigated only group-housed flies. Intriguingly, Asahina *et al.* identified  
201 tachykinin signaling in the lateral protocerebrum and explicitly ruled out involvement of *Dsk* neurons  
202 (Asahina et al., 2014) in GH fly aggression. Thus, male-male aggression in GH and SH flies appears to  
203 be controlled by different neuropeptides in different brain regions. The absence of *Dsk* neurons from the  
204 screen results in GH flies (Asahina et al., 2014), combined with our results showing suppressed  
205 aggression in GH flies regardless of *Dsk* transcription or neural activity, suggests a mechanism that  
206 overrides *Dsk* function.

207 Downregulation of Dsk receptor *CCKLR-17D1* in *Dsk/Dilp2* neurons also increased aggression,  
208 consistent with the observation that some neuropeptidergic neurons, *e.g.* those for neuropeptide F (Shao  
209 et al., 2017; Wen et al., 2005), neuropeptide Y (Qi et al., 2016) and FMRFamide (Ravi et al., 2018) have  
210 receptors to modulate their signaling in an autocrine manner. However, pan-neuronal down-regulation  
211 of *CCKLR-17D1* receptor did not affect aggression (data not shown), suggesting potential antagonistic  
212 effects outside *Dsk/Dilp2* neurons.

213

214 **Homeostatic regulation of behaviors**

215 The U-shaped (“hormetic”) response of the aggression phenotype to both Dsk levels and *Dsk*<sup>+</sup> neuronal  
216 activity are similar to such responses seen for NPF (Asahina et al., 2014; Dierick and Greenspan, 2007)  
217 and dopamine (Alekseyenko et al., 2013) neurons in *Drosophila* aggression. Such effects are not  
218 unexpected, given the ubiquity of such hormetic responses in neuromodulator signaling pathways (Baldi  
219 and Bucherelli, 2005; F.Flood et al., 1987; Monte-Silva et al., 2009) and receptors in general (Calabrese  
220 and Baldwin, 2001). At the level of individual G-protein coupled receptors, such U-shaped responses  
221 (low-dose agonism, high-dose antagonism) arise directly from equations considering receptor expression  
222 level and the effects of receptor activation on downstream signaling pathways (Kohn and Melnick, 2002).  
223 At the circuit level, it is thought that such U-shaped responses help to maintain neuronal activity patterns,  
224 and the resulting behaviors, near homeostatic optima, with deviations resulting in negative feedback  
225 (Arnsten et al., 2012; Brunel and Wang, 2001; Herman, 2013).

226

## 227 **Social experience modulates gene expression in *Drosophila* heads**

228 There have been a number of prior studies on the genetic basis of aggression in *Drosophila*, many  
229 of them performed with DNA microarrays – which record counts for specific transcripts of interest –  
230 rather than with RNA-seq, which counts all transcripts within cells. Four such studies have been  
231 performed in recent years, each identifying a large number of putative aggression-related genes:  
232 (Edwards et al., 2006) found 1672 such transcripts, (Dierick and Greenspan, 2006) found 149, (Wang et  
233 al., 2008) found 183, and (Tauber, 2010) found 339. It should be noted that these four studies used very  
234 different experimental methods: (Edwards et al., 2006) and (Dierick and Greenspan, 2006) bred flies for  
235 aggressive behavior over several generations, and isolated mRNA for microarray analysis at a time  
236 unrelated to aggression events; thus, these genes are generally high in the selected flies. (Wang et al.,  
237 2008) analyzed single-housed and group-housed flies, again irrespective of specific aggression events.

238 (Tauber, 2010), meanwhile, isolated pairs of aggressive flies and obtained mRNA for sequencing directly  
239 following bouts, looking for aggression bout-driven gene expression. Given the substantial differences  
240 in experimental design, and the imperfect reliability of microarray quantification, it is perhaps  
241 unsurprising that of the 1672, 149, 183, and 339 differentially expressed genes in each study,  
242 respectively, there were only 2 in common to all four studies: the olfactory binding protein Obp99b and  
243 CG13794, an unannotated transporter. Obp99b appeared amongst our 25 most significant hits, whereas  
244 CG13794 did not appear to be differentially expressed at all in our assays. Given that the involvement of  
245 Dsk in aggression is quite context-specific, for instance Asahina *et al.* explicitly ruled out involvement  
246 in aggression of group-housed flies (Asahina et al., 2014), it is perhaps unsurprising that it was not found  
247 in several of the screens. In fact, the only one of these four studies to uncover Dsk was the one that  
248 utilized socially isolated flies (Wang et al., 2008), strengthening the notion that Dsk specifically links  
249 social isolation to aggression. It was this link with social behavior that drew our attention to Dsk, and  
250 indeed our experiments bear out that this function is mediated through activity in the central brain. The  
251 pars intercerebralis has been shown to be the seat of regulation of many other social and sexually  
252 dimorphic behaviors (Belgacem and Martin, 2002; Luo et al., 2014; Mattaliano et al., 2007; Terhzaz et  
253 al., 2007).

254 At the other end of the spectrum, olfactory inputs are ubiquitous and odor processing through  
255 olfactory receptors factors into essentially every fly action. Along with Dsk, Obp99b was the most down-  
256 regulated gene in our single-housed males (**Table 1, Supplementary Table S1**). Obp99b was also picked  
257 up in two studies of other social behaviors: courtship-exposed males (Carney, 2007) and male  
258 competition for mates (Mohorianu et al., 2017). Olfactory binding proteins (OBPs) are secreted by  
259 support cells in the antennal trichoid sensilla to assist in odorant binding and recognition by olfactory  
260 receptors (Galindo and Smith, 2001; Larter et al., 2016). A critical role for Obp76a (Lush) in recognition

261 of the pheromone cis-vaccenyl acetate (cVA) by olfactory receptor Or67d, and in driving aggression  
262 following acute pheromone exposure, has been established (Billeter and Levine, 2015; Wang and  
263 Anderson, 2010). However, following chronic cVA exposure, the pheromone also activates a second  
264 receptor, Or65a, which then inhibits Or67d glomeruli and decreases aggression (Liu et al., 2011). The  
265 OBP mediating cVA recognition by Or65a is currently unknown, but appears not to be Lush (Laughlin  
266 et al., 2008). It is possible that the OBP identified in all the screens discussed, *i.e.* Obp99b, recognizes  
267 cVA for signaling through Or65a; it is also possible that it recognizes other odorants. Given its ubiquity  
268 in screens for social behaviors, we speculate that the molecules recognized are likely pheromones.  
269 Obp99b is one of the most male-specific transcripts identified (Fujii and Amrein, 2002), and indeed it  
270 had been previously discovered as a gene in the sex-determination cascade, under its previous name Turn  
271 on Sex-Specificity (Tsx) (Wolfner, 2003). In this set of experiments, we selected Dsk for investigation  
272 because of its link to social context; however, the precise function of Obp99b warrants closer study,  
273 given its probable role in pheromone detection.

274 Other prominent hits from our screen appear interesting, as well (**Table 1, Supplementary Table**  
275 **S1**). The third most isolation-driven down-regulated transcript, *CG6012*, appears to encode a  
276 hydroxysteroid dehydrogenase. Such enzymes have been shown to be critical for pheromone production  
277 in insects, with the related enzyme CG1444 (Spidey) processing both ecdysone and related cuticular  
278 hydrocarbons (Chiang et al., 2016). The Turandot peptides, annotated as stress-response genes, also  
279 appear to play sex-specific roles in behaviors such as courtship. Turandot A and Turandot C, both up-  
280 regulated in isolated males in our study (**Supplementary Table S1**), are greatly female-enriched, and  
281 Turandot C, in particular, is up-regulated in female flies following playing of an attractive, conspecific  
282 courtship song over a speaker (Immonen and Ritchie, 2012). Finally, we would note that new roles have  
283 recently been proposed for transcripts annotated as encoding antimicrobial peptides (*e.g.* Diptericin B,



## Dsk mediated *Drosophila* aggression

284 DptB), specifically the modulation of long-term memory (Barajas-Azpeleta et al., 2018). It is possible  
285 that some of the transcripts annotated as antimicrobial peptides are instead (or in addition) memory  
286 regulators with roles in social behaviors. Indeed, playing synthetic attractive, conspecific *versus* aversive,  
287 heterospecific courtship song dramatically lowered expression of the ostensibly antimicrobial peptides  
288 Attacin-A, Attacin-C, DptB, Drosocin, and Immune-induced molecule 18 (Immonen and Ritchie, 2012).  
289 Intriguingly, all of these molecules were increased in males following aversive social isolation in our  
290 study (**Figure 1 B, C, Supplementary Table S1**). The only other molecule shared between the two  
291 studies, Methuselah-like 8, showed the opposite pattern: up-regulated in females hearing attractive song  
292 and down-regulated in males after aversive isolation. Of course, given the wealth of bacteria, fungi,  
293 viruses and other microbes present in and on flies and their food, it is probable that many annotated  
294 antimicrobial peptides are indeed responding to differences in pathogen load composition between SH  
295 and GH flies. But the observation that many putatively antimicrobial molecules respond strongly to  
296 stimuli (*e.g.* synthetic courtship song) that do not involve alteration of their physical environment in any  
297 way indicates that these molecules have more sophisticated functions in the brain, and may encode  
298 valence (attractive, aversive) of social interactions.

299

### 300 **Dsk and its homologue CCK have evolutionarily conserved role in regulating aggression**

301 In mammals, the Dsk homologue cholecystokinin (CCK) and its receptors regulate aggression, anxiety,  
302 and social-defeat responses (Katsouni et al., 2013; Li et al., 2007; Panksepp et al., 2004; Vasar et al.,  
303 1993; Zwanzger et al., 2012). For instance, intravenous injection of the smallest isoform, CCK-4, in  
304 humans reliably induces panic attacks (Bradwejn et al., 1991; Tōru et al., 2010) and is often used to  
305 screen anxiolytic drug candidates. However, in other contexts, such as in mating (Bloch et al., 1987) and  
306 juvenile play (Burgdorf et al., 2006), CCK encodes strong positive valence. CCK colocalizes with

307 dopamine in the ventral striatum, and microinjection of CCK into the rat nucleus accumbens phenocopies  
308 the effects of dopamine agonists, increasing attention and reward-related behaviors (Vaccarino, 1994),  
309 further supporting its role in positive valence encoding. CCK actions differ across brain regions, in a  
310 context-dependent manner. For instance, time pinned (negative-valence) during rough-and-tumble play  
311 correlated with increased CCK levels in the posterior cortex and decreased levels in hypothalamus  
312 (Burgdorf et al., 2006). However, lower hypothalamic CCK also correlated with positive-valence play  
313 aspects including dorsal contacts and 50 kHz ultrasonic vocalizations. Thus, CCK can encode both  
314 positive- and negative-valence aspects of complex behaviors differentially across the brain. As with  
315 many neuromodulators (Calabrese, 2001; Cools and D'Esposito, 2011; Joëls, 2006), CCK appears to act  
316 in a U-shaped fashion, with increases and decreases of signaling from baseline levels often producing  
317 similar phenotypes (Burgdorf et al., 2006; Calabrese and Baldwin, 2003; Ding and Bayer, 1993; Köks et  
318 al., 1999; Kulkosky et al., 1976).

319 Taken together, our results suggest an evolutionarily-conserved role for neuropeptide signaling  
320 through the drosulfakinin pathway (homologue of cholecystokinin) in promoting aggression.  
321 Intriguingly, this pathway only seems active in socially-isolated flies; in socially-enriched flies,  
322 aggression is controlled by tachykinin (*a.k.a.* Substance P) signaling. The PI region, in which the  
323 *Dsk/Dilp2* neurons reside, has considerable similarities with the hypothalamus (Hartenstein, 2006), a  
324 brain region crucial for regulating aggression in mammals (Gregg and Siegel, 2001; Haller, 2013; Kruk  
325 et al., 1984; Lin et al., 2011; Lipp and Hunsperger, 1978; Toth et al., 2010), with the most relevant  
326 activity localized to the ventrolateral subdivision of the ventromedial hypothalamus (Lin et al., 2011),  
327 where CCK neurons reside (Fulwiler and Saper, 1985). Thus, the predominant aggression-regulating  
328 mechanism in rodents bears strong homology to the fly pathway regulating aggression of socially-  
329 deprived, but not socially-enriched, individuals.

330

331

## MATERIALS AND METHODS

### 332 Fly stocks & rearing

333 Flies were reared on standard food at 25°C and 65% relative humidity with a 12-h light/dark cycle. For  
334 behavioral and molecular experiments, flies were collected within 24-48 hours of eclosion and group  
335 housed (GH) or single housed (SH) for four days, unless mentioned otherwise. The following fly strains  
336 were obtained from the Bloomington stock center: *Dsk*-GAL4 (#BL51981; Asahina et al., 2014); *Dilp2*-  
337 GAL4 (*Dilp2* a.k.a. *Ilp2*; #BL37516); *elav*-GAL4<sup>c155</sup> (#BL458). For *Dsk*- and *Dilp2*-GAL4 expression  
338 analysis a fluorescent reporter (Etheredge et al., 2018) carrying *pJFRC105-10XUAS-IVS-NLS-*  
339 *tdTomato* in VK00040 (a gift of Barret D. Pfeiffer, Rubin lab, Janelia Research Campus) and *pJFRC29-*  
340 *10XUAS-IVS-myr::GFP-p10* in attP40 (Pfeiffer et al., 2012) was used. For examining CCKLR-17D1  
341 expression a MiMIC reporter (Nagarkar-Jaiswal et al., 2015) (#BL 61771; y[1] w[\*] Mi{PT-  
342 GFSTF.2}CCKLR-17D1[MI03679-GFSTF.2]) was used. For aggression and qPCR assays, comparisons  
343 were made between equivalent genetic backgrounds. The stock used for neural silencing *pUAS-Kir2.1-*  
344 *EGFP* and its corresponding control *pJFRC2-10XUAS-IVS-mCD8::GFP* were obtained from the Fly  
345 Facility Shared Resource at Janelia Research Campus. *Dsk*-GAL4, *Dilp2*-GAL4 and *elav*-GAL4<sup>c155</sup> and  
346 stocks used for neural activation (*UAS-NaChBac*, #BL9466 and control *UAS-mCD8::GFP*, #BL5130)  
347 were outcrossed for 6-7 generations into *w*; Berlin background. The following Transgenic RNAi Project  
348 (TRiP) RNAi lines (Perkins et al., 2015) were obtained from the Bloomington stock center: *Dsk*-RNAi  
349 (#BL25869); *CCKLR-17D1*-RNAi (#BL27494); *CCKLR-17D3*-RNAi (#BL28333) and the *attP2*  
350 background control without RNAi insert (#BL36303). To negate effects of the mini-white gene on  
351 aggression (Hoyer et al., 2008), male progenies containing (*w* y[1] v[1]) were obtained by crossing virgin

352 females of various GAL4 drivers and males of TRiP RNAi for *Dsk*, *CCKLR-17D1* and *CCKLR-17D3* or  
353 corresponding background controls.

354

### 355 **Immunohistochemistry and imaging**

356 Fly brains were dissected in cold 1X PBS and fixed in 2% paraformaldehyde (in 1X PBS) at room  
357 temperature for one hour on a Nutator, washed 4 times for 20 min each in PAT (1X PBS, 0.5% PBS  
358 Triton, 1% BSA) at room temperature, blocked for one hour at room temperature with blocking buffer  
359 (PAT + 3% Normal Goat Serum) and incubated with primary antibodies, diluted in blocking buffer,  
360 overnight on a Nutator at 4°C. The primary antibodies used were: mouse anti-GFP (Sigma-Aldrich,  
361 #G6539, 1:200 dilution); Rabbit anti-DsRed (Clontech, 632496, 1:500 dilution), rat anti-DN-cadherin  
362 (Developmental Studies Hybridoma Bank, DNEX#8, 1:50 dilution), mouse anti-Flag (Sigma-Aldrich,  
363 #F1804, 1:100 dilution); and Rat anti-Dilp2 (1:800 dilution, Eric Rulifson). This was followed by 4  
364 washes for 20 min each in PAT, and incubation overnight on a Nutator at 4°C with secondary antibodies  
365 diluted in blocking buffer. The secondary antibodies were all from Molecular Probes and used at 1:500  
366 dilution:

367 Alexa Fluor 488 anti-mouse (A11029), Alexa Fluor 568 anti-rabbit (A11036), Alexa Fluor 568 anti-  
368 rat (A11077) and Alexa Fluor 633 anti-rat (A21094). Brains were then washed 4 times for 20 min each  
369 in PAT at room temperature, 1 time for 20 min in 1X PBS and mounted with VECTASHIELD mounting  
370 medium (Vector Laboratories, H-1000). Samples were imaged on a Zeiss 800 confocal laser-scanning  
371 microscope.

372

### 373 **RNA extraction, library preparation and sequencing**

374 Male Canton-S flies collected within 24-48 hours of eclosion were group housed (GH) or single housed  
375 (SH) for four days and flash-frozen during the afternoon and stored at -80°C until RNA extraction. 10-  
376 15 flies were vortex-decapitated and heads were collected on dry ice. Heads were lysed in Trizol, and  
377 total RNA was extracted using a Zymo Direct Zol kit (Zymo Research, USA: #R2051), in-tube DNase  
378 digestion was performed using a Turbo DNA free kit (Thermo Fisher Scientific, USA: #AM1907), and  
379 RNA was purified using a Zymo RNA Clean and Concentrator kit (Zymo Research, USA: #R1013) as  
380 per manufacturer's instructions. External RNA Controls Consortium (ERCC) spike-ins were added, and  
381 RNA was processed for sequencing using Ovation RNA-Seq System V2 (Nugen Technologies, USA:  
382 #7102-32) and Ovation Rapid DR Multiplex System 1-8 (Nugen Technologies, USA: #0319-32) as per  
383 manufacturer's instructions. Two biological replicates were performed for each condition. Paired-end  
384 100 bp sequencing reads were obtained using Illumina Hi-seq 2500 (Illumina, San Diego, CA).

385

### 386 **RNA-seq analysis**

387 All reads were trimmed with Trimmomatic 0.36 at a minimum read length of 50 and average read quality  
388 across a sliding window of 15. Trimmed reads were mapped to *Drosophila* genome version r6.03 with  
389 STAR (Dobin et al., 2013) with default settings. Pairwise differential expression analysis was performed  
390 with DESeq2, EBseq, and edgeR following instructions given in the respective R package's workflow.  
391 Genes that were differentially expressed at stricter than an adjusted (corrected for multiple testing using  
392 the Benjamini-Hochberg method) P-value of 0.05 and fold-change greater than 2 were used for further  
393 analysis. Gene Ontology (GO) analysis was performed on enriched genes using GOrilla ([http://cbl-  
394 gorilla.cs.technion.ac.il/](http://cbl-gorilla.cs.technion.ac.il/)). ~5,000 genes expressed in fly heads were used as background for GO analysis

## Dsk mediated *Drosophila* aggression

395 and obtained from FlyBase (<http://www.flybase.org>). The raw data from RNA-seq experiments has been  
396 deposited into the Sequence Read Archive (<https://www.ncbi.nlm.nih.gov/sra>) with accession number:  
397 PRJNA481582.

398

### 399 **qPCR validation**

400 RNA was extracted from heads of flies as described in previous sections. Genotype and age of flies used  
401 for qPCR was matched to their corresponding behavioral assay. After RNA extraction, cDNA was  
402 prepared using a SuperScript VILO Master Mix kit (Thermo-Fisher Scientific, USA: #11755050). qPCR  
403 was performed using Brilliant III Ultra-Fast QPCR Master Mix (Agilent Technologies: #600880) on a  
404 StepOne Plus Real-Time PCR System (Thermo-Fisher Scientific, USA: #4376600). The following  
405 hydrolysis probes (Applied Biosystems, Life Technologies, USA) were used: RPL32 (*Dm02151827\_g1*:  
406 #4331182) as an endogenous control, *Dsk* (*Dm02152147\_s1*: #4351372), CCKLR-17D1  
407 (*Dm01813942\_g1*: # 4448892) and CCKLR-17D3 (*Dm01813944\_m1*: # 4448892) as test probes.

408

### 409 **Aggression assay**

410 The assay was performed essentially as described before (Dankert et al., 2009; Kim et al., 2018). In brief,  
411 males of a given genotype were introduced as a pair by gentle aspiration into single wells (16 mm  
412 diameter and 10mm height) of 12-well chambers. Chamber floors were made from 2.25% w/v agarose  
413 in commercial apple juice and 2.5% (w/v) sucrose. Walls of the arena were covered with Fluon (BioQuip)  
414 to prevent flies from climbing the walls. Flies were allowed to acclimatize to the arena for 5 minutes,  
415 and then fights were recorded for 20 minutes at 30 frames per second. All fights were performed during  
416 the morning activity peak within 2.5 hours of lights on, at 25°C and ~40% relative humidity. Lunges

417 were counted by CADABRA (Caltech Automated *Drosophila* Aggression-Courtship Behavioral  
418 Repertoire Analysis) software (Dankert et al., 2009).

419

#### 420 **Locomotor activity analysis**

421 Flies of various genotypes that were previously SH or GH for 4 days were anesthetized briefly by carbon  
422 dioxide and transferred into 5mm × 65mm transparent plastic tubes with standard cornmeal dextrose agar  
423 media. For recording locomotion levels, *Drosophila* activity monitors (Trikinetics, Waltham, USA) were  
424 kept in incubators at 25°C with 65% relative humidity on a 12-h light/dark cycle. Flies were allowed one  
425 night to acclimatize to the activity monitor, and then data was collected in 1-minute bins for 24 hours  
426 (day-time plus night-time activity) as described before (Donelson et al., 2012).

427

#### 428 **Statistical analysis**

429 Statistical analysis of behavioral data was performed using Prism 7 (Graph pad software). Aggression  
430 data is usually non-normally distributed and appropriate non-parametric tests were chosen. For activity  
431 data parametric test were chosen. Unless specified, we used ANOVA (non-parametric or parametric, as  
432 appropriate), followed by appropriate *post hoc* tests of significance. We used Mann-Whitney U (*a.k.a.*  
433 Wilcoxon rank-sum), Kruskal-Wallis and Student's t-tests of significance, as appropriate.

434

435

436 **Supplementary Figures with legends**

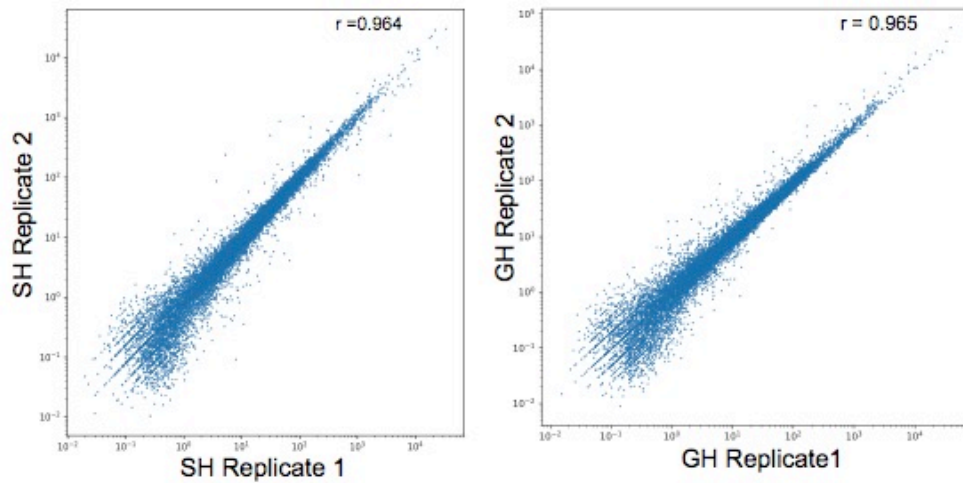

437  
438 **Supplementary Figure S1. Replicate concordance of RNA-seq for GH and SH datasets.** Pearson r-coefficients  
439 were calculated on the Transcripts Per Million (TPM) values for independent biological replicates (N=2) for RNA-  
440 seq data obtained from heads of (A) single-housed (SH) and (B) group-housed (GH) flies.

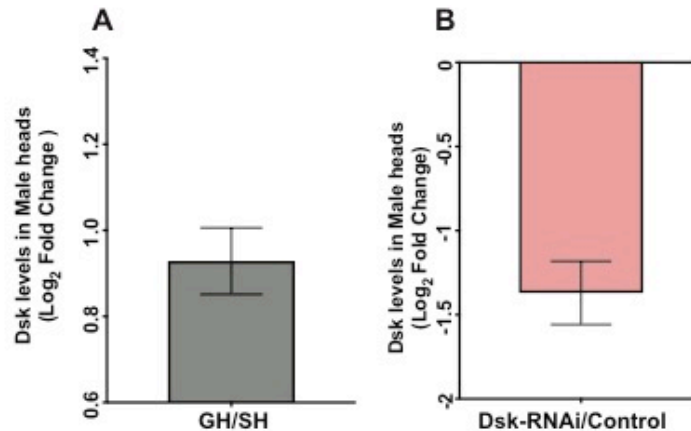

441  
442 **Supplementary Figure S2. qPCR confirmation of Dsk upregulation upon group-housing and RNAi-**  
443 **mediated knockdown.** (A) qPCR confirmation of *Dsk* transcriptional up-regulation in GH fly heads compared to  
444 SH fly heads. (N= 6 biological replicates). (B) qPCR confirmation of *Dsk* knockdown. *Dsk-RNAi* was driven pan-  
445 neuronally by *elav-GAL4<sup>c155</sup>* and compared with controls without RNAi insert driven by *elav-GAL4<sup>c155</sup>*. (N= 5  
446 biological replicates). Y-axis shows Log<sub>2</sub> Fold change of *Dsk* expression calculated using the  $\Delta\Delta Ct$  method; error  
447 bars show mean  $\pm$  SEM. *Rpl32* was used as an endogenous control.



## Dsk mediated *Drosophila* aggression

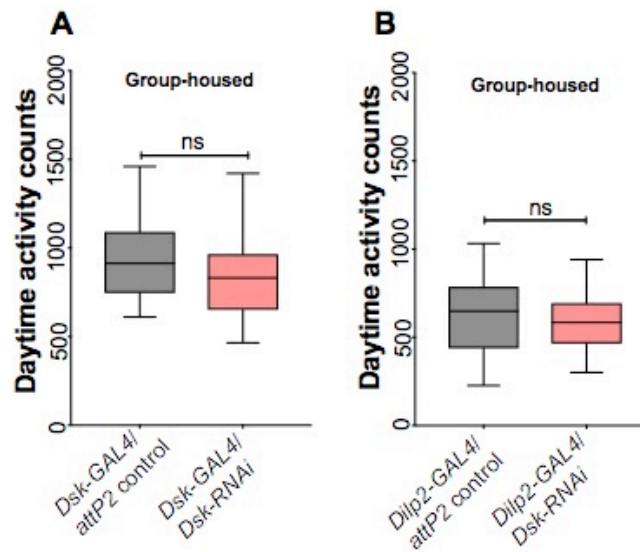

448

449 **Supplementary Figure S3. Group-housed flies do not show differences in overall daytime activity upon *Dsk***

450 **knockdown.** Daytime activity is not significantly affected when *Dsk* was down-regulated using (A) *Dsk*-GAL4

451 driver GH, Student's t-test; N=32; and (B) *Dilp2*-GAL4 driver GH, Student's t-test; N=32.

452

Dsk mediated *Drosophila* aggression

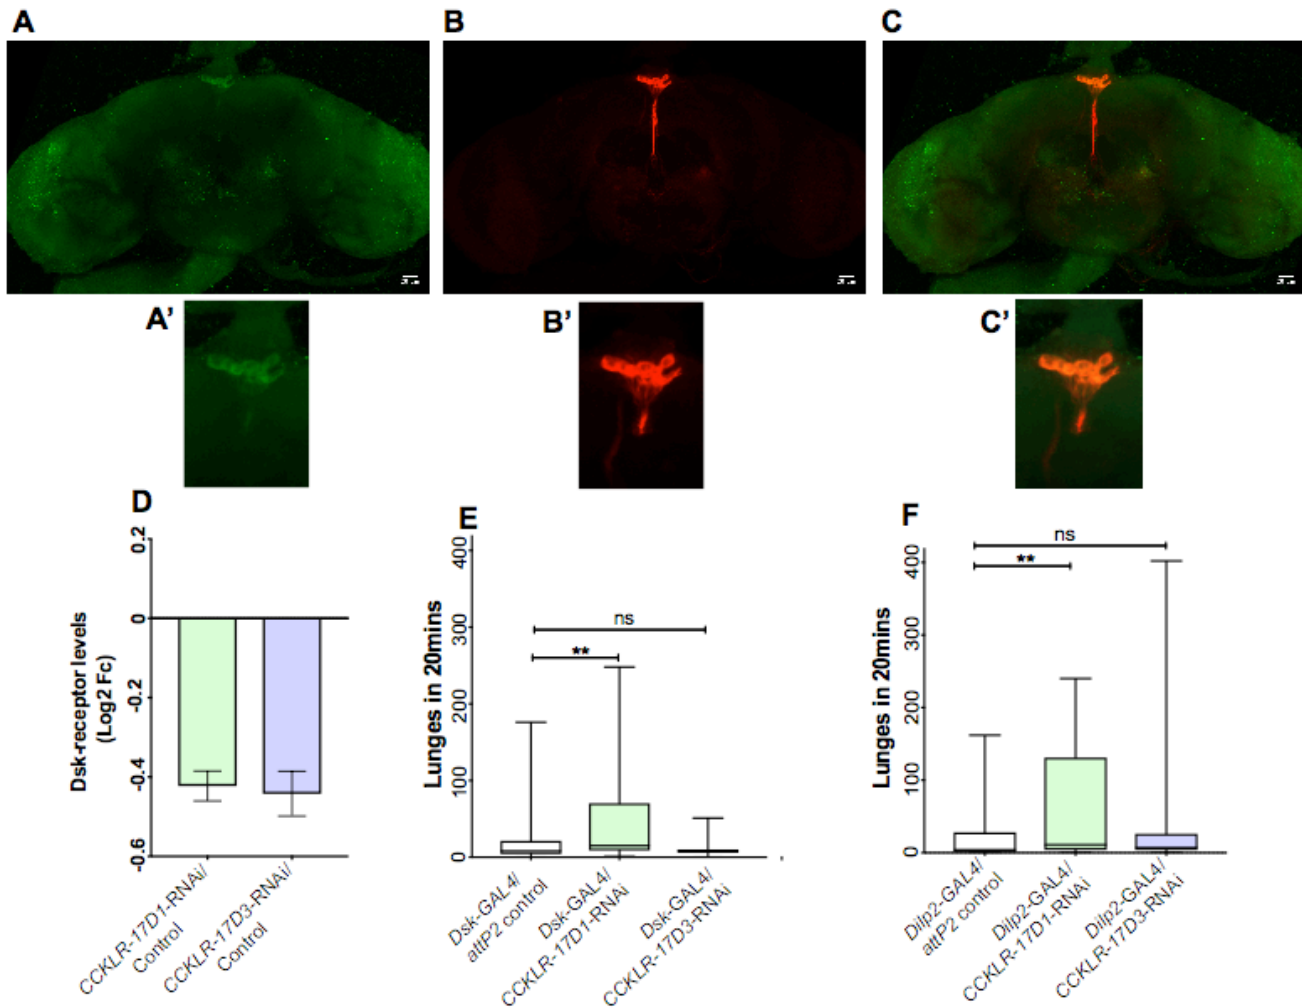

453

454 **Supplementary Figure S4. Aggression is mediated by the CCKLR1-17D1 receptor in peptidergic neurons.**

455 *CCKLR-17D1* expression in the brain ascertained using a MiMiC reporter line. (A) *CCKLR-17D1* reporter (green)

456 is expressed in various brain regions including in PI region, where (B) *Dilp2* is expressed (red). (C) Overlap in PI

457 region is shown. Scale bar is 20  $\mu$ m. A', B' and C' show zoomed images from PI region. (D) qPCR confirmation

458 of *CCKLR-17D1* and *CCKLR-17D3* knockdown. RNAi constructs against *CCKLR* were driven pan-neuronally by

459 *elav-GAL4<sup>el155</sup>* and compared with controls without RNAi insert driven by *elav-GAL4<sup>el155</sup>* (N=3 biological

460 replicates). Y-axis shows Log<sub>2</sub> Fold change of *Dsk* expression calculated using the  $\Delta\Delta$ Ct method; error bars show

461 mean  $\pm$  SEM. *Rpl32* probe was used as an endogenous control. (E,F) Knockdown of *CCKLR-17D1* led to increased

462 aggression in both (E) *Dsk-GAL4*> *CCKLR-17D1*-RNAi (P= 0.003, Kruskal-Wallis ANOVA with Dunn's

463 multiple comparison test, N= 44-48) and (F) *Dilp2-GAL4*> *CCKLR-17D1*-RNAi (P= 0.0045, Kruskal-Wallis

Dsk mediated *Drosophila* aggression

464 ANOVA with Dunn's multiple comparison test, N=47-48). Aggression was not significantly affected when  
 465 *CCKLR-17D3* was down-regulated in either GAL4 driver line.

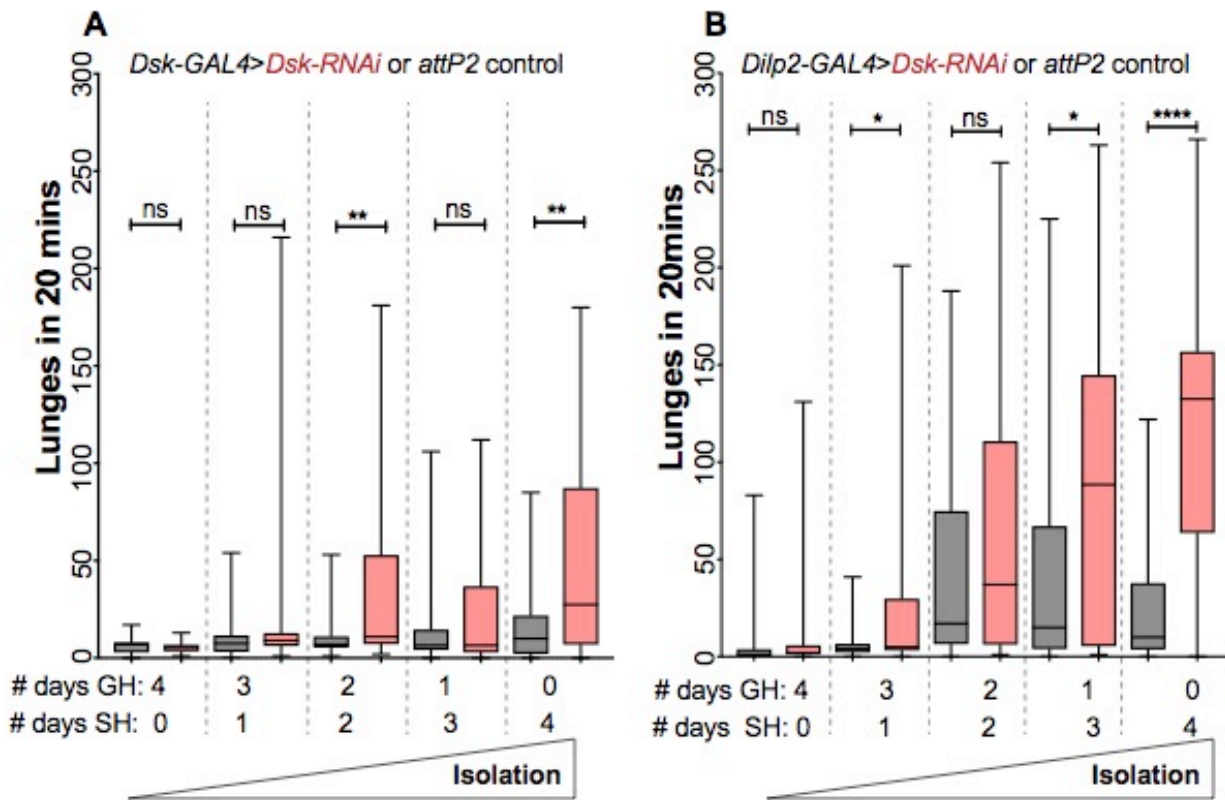

466

467 **Supplementary Figure S5. Effect of increased degree of social-isolation on *Dsk* knockdown-mediated**  
 468 **aggression.** Lunge numbers versus degree of isolation, GAL4 driver line, and *Dsk*-RNAi vs. *attP2* background  
 469 control. Flies were group housed (20 males/vial) followed by single-housing. for varying degree. (A) *Dsk*-GAL4.  
 470 \*\*, P = 0.008 for 2-days GH > 2-days SH; \*\*, P = 0.0096 for 4 days of SH. N= 25-41. Mann-Whitney U-test. (B)  
 471 *Dilp2*-GAL4. \*, P = 0.043 for 3-days GH > 1-day SH; \*, P = 0.013 for 1-day GH > 3-day SH and \*\*\*\*; P < 0.0001  
 472 for 4 days of SH. N= 31-49. Mann-Whitney U-test.

473

474 **ACKNOWLEDGMENTS**

475 We would like to thank Ulrike Heberlein for her support throughout this work, helpful discussions and  
476 critical reading of this manuscript. We thank Serge Picard, Andy Lemire and Janelia Quantitative  
477 Genomics for sequencing, Clement Kent and Anton Schulmann for helpful discussions related to RNA-  
478 seq analysis. We thank Karen Hibbard and Fly Facility Shared Resource at Janelia for help with fly  
479 genetics, Herman Dierick (Baylor College of Medicine, USA), Barret Pfeiffer, Gerald Rubin and Jack  
480 Etheredge (Janelia) for fly stocks. We also thank Lisha Shao, Mark Eddison and Jasper Simon (Janelia)  
481 for helpful discussions.

482

483 **COMPETING INTERESTS**

484 The authors declare no competing interests exist.

485 **AUTHOR CONTRIBUTIONS**

486 PA conceptualized the project, designed and performed experiments, analyzed data and wrote the  
487 manuscript. DK performed RNA-seq analysis. PC performed immunostaining and imaging. LLL  
488 designed experiments, analyzed the data and wrote the manuscript. All authors reviewed the final MS.

489

490 **FUNDING**

491 This work was supported by funding from the Howard Hughes Medical Institute.

492

493

494

## REFERENCES

- 495 **Agrawal, P., Chung, P., Heberlein, U. and Kent, C. F.** (2019). Enabling cell-type-specific behavioral  
496 epigenetics in *Drosophila*: a modified high-yield INTACT method reveals the impact of social  
497 environment on the epigenetic landscape in dopaminergic neurons. *BMC Biol.* **17**, 30.
- 498 **Alekseyenko, O. V., Lee, C. and Kravitz, E. A.** (2010). Targeted manipulation of serotonergic  
499 neurotransmission affects the escalation of aggression in adult male *drosophila melanogaster*.  
500 *PLoS One* **5**, e10806.
- 501 **Alekseyenko, O. V, Chan, Y.-B., Li, R. and Kravitz, E. A.** (2013). Single dopaminergic neurons that  
502 modulate aggression in *Drosophila*. *Proc. Natl. Acad. Sci. U. S. A.* **110**, 6151–6.
- 503 **Alekseyenko, O. V., Chan, Y.-B., Fernandez, M. de la P., Bülow, T., Pankratz, M. J. and Kravitz,**  
504 **E. A.** (2014). Single Serotonergic Neurons that Modulate Aggression in *Drosophila*. *Curr. Biol.*  
505 **24**, 2700–2707.
- 506 **Anholt, R. R. H., Dilda, C. L., Chang, S., Fanara, J. J., Kulkarni, N. H., Ganguly, I., Rollmann, S.**  
507 **M., Kamdar, K. P. and Mackay, T. F. C.** (2003). The genetic architecture of odor-guided  
508 behavior in *Drosophila*: Epistasis and the transcriptome. *Nat. Genet.* **35**, 180–184.
- 509 **Arnsten, A. F. T., Wang, M. J. and Paspalas, C. D.** (2012). Neuromodulation of Thought:  
510 Flexibilities and Vulnerabilities in Prefrontal Cortical Network Synapses. *Neuron* **76**, 223–239.
- 511 **Asahina, K.** (2017). Neuromodulation and Strategic Action Choice in *Drosophila* Aggression. *Annu.*  
512 *Rev. Neurosci.* **40**, 51–75.
- 513 **Asahina, K., Watanabe, K., Duistermars, B. J., Hoopfer, E., González, C. R., Eyjólfsson, E. A.,**

- 514 **Perona, P. and Anderson, D. J.** (2014). Tachykinin-expressing neurons control male-specific  
515 aggressive arousal in *Drosophila*. *Cell* **156**, 221–35.
- 516 **Baier, A., Wittek, B. and Brembs, B.** (2002). *Drosophila* as a new model organism for the  
517 neurobiology of aggression? *J. Exp. Biol.* **205**, 1233–40.
- 518 **Baines, R. a, Uhler, J. P., Thompson, a, Sweeney, S. T. and Bate, M.** (2001). Altered electrical  
519 properties in *Drosophila* neurons developing without synaptic transmission. *J. Neurosci.* **21**,  
520 1523–1531.
- 521 **Baldi, E. and Bucherelli, C.** (2005). The Inverted “U-Shaped” Dose-Effect Relationships in Learning  
522 and Memory: Modulation of Arousal and Consolidation. *Nonlinearity Biol. Toxicol. Med.* **3**, 9–21.
- 523 **Barajas-Azpeleta, R., Wu, J., Gill, J., Welte, R., Seidel, C., McKinney, S., Dissel, S. and Si, K.**  
524 (2018). Antimicrobial peptides modulate long-term memory. *PLoS Genet.* **14**, e1007440.
- 525 **Belgacem, Y. H. and Martin, J. R.** (2002). Neuroendocrine control of a sexually dimorphic behavior  
526 by a few neurons of the pars intercerebralis in *Drosophila*. *Proc Natl Acad Sci U S A* **99**, 15154–  
527 15158.
- 528 **Billeter, J.-C. and Levine, J. D.** (2015). The role of cVA and the Odorant binding protein Lush in  
529 social and sexual behavior in *Drosophila melanogaster*. *Front. Ecol. Evol.* **3**, 1–14.
- 530 **Bloch, G. J., Babcock, A. M., Gorski, R. A. and Micevych, P. E.** (1987). Cholecystokinin stimulates  
531 and inhibits lordosis behavior in female rats. *Physiol. Behav.* **39**, 217–224.
- 532 **Bradwejn, J., Koszycki, D. and Bourin, M.** (1991). Dose ranging study of the effects of  
533 cholecystokinin in healthy volunteers. *J. Psychiatry Neurosci.* **16**, 91–95.

- 534 **Brunel, N. and Wang, X.** (2001). Effects of Neuromodulation in a Cortical Network Model of Object  
535 Working. *J. Comput. Neurosci.* **11**, 63–85.
- 536 **Burgdorf, J., Panksepp, J., Beinfeld, M. C., Kroes, R. A. and Moskal, J. R.** (2006). Regional brain  
537 cholecystokinin changes as a function of rough-and-tumble play behavior in adolescent rats.  
538 *Peptides* **27**, 172–177.
- 539 **Calabrese, E. J.** (2001). 5-Hydroxytryptamine (Serotonin): Biphasic Dose Responses. *Crit. Rev.*  
540 *Toxicol.* **31**, 553–561.
- 541 **Calabrese, E. J. and Baldwin, L. A.** (2001). Hormesis: U-shaped dose responses and their centrality  
542 in toxicology. *Trends Pharmacol. Sci.* **22**, 285–291.
- 543 **Calabrese, E. J. and Baldwin, L. A.** (2003). HORMESIS: The Dose-Response Revolution. *Annu.*  
544 *Rev. Pharmacol. Toxicol.* **43**, 175–197.
- 545 **Carney, G. E.** (2007). A rapid genome-wide response to *Drosophila melanogaster* social interactions.  
546 *BMC Genomics* **8**, 2–11.
- 547 **Certel, S. J., Savella, M. G., Schlegel, D. C. F. and Kravitz, E. A.** (2007). Modulation of *Drosophila*  
548 male behavioral choice. *Proc. Natl. Acad. Sci. U. S. A.* **104**, 4706–11.
- 549 **Chen, X. and Ganetzky, B.** (2012). A neuropeptide signaling pathway regulates synaptic growth in  
550 *Drosophila*. *J. Cell Biol.* **196**, 529–543.
- 551 **Chen, S., Lee, A. Y., Bowens, N. M., Huber, R. and Kravitz, E. A.** (2002). Fighting fruit flies: a  
552 model system for the study of aggression. *Proc. Natl. Acad. Sci. U. S. A.* **99**, 5664–8.
- 553 **Chen, X., Peterson, J., Nachman, R. J. and Ganetzky, B.** (2012). Drosulfakinin activates CCKLR-

- 554 17D1 and promotes larval locomotion and escape response in *Drosophila*. *Fly (Austin)*. **6**, 290–  
555 297.
- 556 **Chen, X., Rahman, R., Guo, F. and Rosbash, M.** (2016). Genome-wide identification of neuronal  
557 activity-regulated genes in *Drosophila*. *Elife* **5**, e19942.
- 558 **Chiang, Y. N., Tan, K. J., Chung, H., Lavrynenko, O., Shevchenko, A. and Yew, J. Y.** (2016).  
559 Steroid Hormone Signaling Is Essential for Pheromone Production and Oenocyte Survival. *PLoS*  
560 *Genet.* **12**, 1–25.
- 561 **Cole, S. W., Capitanio, J. P., Chun, K., Arevalo, J. M. G., Ma, J. and Cacioppo, J. T.** (2015).  
562 Myeloid differentiation architecture of leukocyte transcriptome dynamics in perceived social  
563 isolation. *Proc. Natl. Acad. Sci.* **112**, 15142–15147.
- 564 **Cools, R. and D’Esposito, M.** (2011). Inverted-U shaped dopamine actions on human working  
565 memory and cognitive control. *Biol. Psychiatry* **69**, e113–e125.
- 566 **Dankert, H., Wang, L., Hoopfer, E. D., Anderson, D. J. and Perona, P.** (2009). Automated  
567 monitoring and analysis of social behavior in *Drosophila*. *Nat. Methods* **6**, 297–303.
- 568 **Davis, S. M., Thomas, A. L., Nomie, K. J., Huang, L. and Dierick, H. A.** (2014). Tailless and  
569 Atrophin control *Drosophila* aggression by regulating neuropeptide signalling in the pars  
570 intercerebralis. *Nat. Commun.* **5**, 3177.
- 571 **Dierick, H. a and Greenspan, R. J.** (2006). Molecular analysis of flies selected for aggressive  
572 behavior. *Nat. Genet.* **38**, 1023–31.
- 573 **Dierick, H. A. and Greenspan, R. J.** (2007). Serotonin and neuropeptide F have opposite modulatory



- 574 effects on fly aggression. *Nat. Genet.* **39**, 678–682.
- 575 **Ding, X. Z. and Bayer, B. M.** (1993). Increases of CCK mRNA and peptide in different brain areas  
576 following acute and chronic administration of morphine. *Brain Res.* **625**, 139–44.
- 577 **Dobin, A., Davis, C. a., Schlesinger, F., Drenkow, J., Zaleski, C., Jha, S., Batut, P., Chaisson, M.**  
578 **and Gingeras, T. R.** (2013). STAR: ultrafast universal RNA-seq aligner. *Bioinformatics* **29**, 15–  
579 21.
- 580 **Donelson, N., Kim, E. Z., Slawson, J. B., Vecsey, C. G., Huber, R. and Griffith, L. C.** (2012).  
581 High-resolution positional tracking for long-term analysis of *Drosophila* sleep and locomotion  
582 using the “tracker” program. *PLoS One* **7**, e37250.
- 583 **Dow, M. A. and Schilcher, F. von** (1975). Aggression and mating success in *Drosophila*  
584 *melanogaster*. *Nature* **254**, 511–512.
- 585 **Edwards, A. C., Rollmann, S. M., Morgan, T. J. and Mackay, T. F. C.** (2006). Quantitative  
586 genomics of aggressive behavior in *Drosophila melanogaster*. *PLoS Genet.* **2**, e154.
- 587 **Ellen, K., Tuchscherer, M., Puppe, B., Tuchscherer, A. and Bernd Stabenow** (2004).  
588 Consequences of repeated early isolation in domestic piglets (*Sus scrofa*) on their behavioural,  
589 neuroendocrine, and immunological responses. *Brain Behav. Immun.* **18**, 35–45.
- 590 **Ellis, L. L. and Carney, G. E.** (2011). Socially-responsive gene expression in male *Drosophila*  
591 *melanogaster* is influenced by the sex of the interacting partner. *Genetics* **187**, 157–169.
- 592 **Etheredge, J., Baumann, A. and Truman, J. W.** (2018). Fluorescent reporter combination  
593 optimization for flow cytometry purity of labeled *Drosophila* neurons.

- 594 <https://doi.org/10.6084/m9.figshare.6934250.v1>.
- 595 **F.Flood, J., N.Hernandez, E. and E.Morley, J.** (1987). Modulation of memory processing by  
596 neuropeptide Y. *Brain Res.* **421**, 280–290.
- 597 **Ferguson, C. J., Averill, P. M., Rhoades, H., Rocha, D., Gruber, N. P. and Gummattira, P.** (2005).  
598 Social isolation, impulsivity and depression as predictors of aggression in a psychiatric inpatient  
599 population. *Psychiatr. Q.* **76**, 123–137.
- 600 **Fujii, S. and Amrein, H.** (2002). Genes expressed in the *Drosophila* head reveal a role for fat cells in  
601 sex-specific physiology. *EMBO J.* **21**, 5353–5363.
- 602 **Fulwiler, C. E. and Saper, C. B.** (1985). Cholecystokinin-immunoreactive innervation of the  
603 ventromedial hypothalamus in the rat: Possible substrate for autonomic regulation of feeding.  
604 *Neurosci. Lett.* **53**, 289–296.
- 605 **Galindo, K. and Smith, D. P.** (2001). A large family of divergent *Drosophila* odorant-binding proteins  
606 expressed in gustatory and olfactory sensilla. *Genetics* **159**, 1059–1072.
- 607 **Ganguly-Fitzgerald, I., Donlea, J. and Shaw, P. J.** (2006). Waking experience affects sleep need in  
608 *Drosophila*. *Science.* **313**, 1775–81.
- 609 **Gregg, T. R. and Siegel, A.** (2001). Brain structures and neurotransmitters regulating aggression in  
610 cats: Implications for human aggression. *Prog. Neuro-Psychopharmacology Biol. Psychiatry* **25**,  
611 91–140.
- 612 **Grippe, A. J., Cushing, B. S. and Carter, C. S.** (2007). Depression-like behavior and stressor-  
613 induced neuroendocrine activation in female prairie voles exposed to chronic social isolation.

- 614 *Psychosom Med* **69**, 149–157.
- 615 **Hall, F. S., Wilkinson, L. S., Humby, T., Inglis, W., Kendall, D. A., Marsden, C. A. and Robbins,**  
616 **T. W.** (1998). Isolation rearing in rats: Pre- and postsynaptic changes in striatal dopaminergic  
617 systems. *Pharmacol. Biochem. Behav.* **59**, 859–872.
- 618 **Haller, J.** (2013). The neurobiology of abnormal manifestations of aggression-A review of  
619 hypothalamic mechanisms in cats, rodents, and humans. *Brain Res. Bull.* **93**, 97–109.
- 620 **Hartenstein, V.** (2006). The neuroendocrine system of invertebrates: A developmental and  
621 evolutionary perspective. *J. Endocrinol.* **190**, 555–570.
- 622 **Herman, J. P.** (2013). Neural control of chronic stress adaptation. *Front. Behav. Neurosci.* **7**, 1–12.
- 623 **Hoffmann, A. A.** (1987). A laboratory study of male territoriality in the sibling species *Drosophila*  
624 *melanogaster* and *D. simulans*. *Anim. Behav.* **35**, 807–818.
- 625 **Hoffmann, A. A.** (1989). The influence of age and experience with conspecifics on territorial behavior  
626 in *Drosophila melanogaster*. *J. Insect Behav.* **3**, 1–12.
- 627 **Hoopfer, E. D.** (2016). Neural control of aggression in *Drosophila*. *Curr. Opin. Neurobiol.* **38**, 109–  
628 118.
- 629 **Hoyer, S. C., Eckart, A., Herrel, A., Zars, T., Fischer, S. a, Hardie, S. L. and Heisenberg, M.**  
630 (2008). Octopamine in male aggression of *Drosophila*. *Curr. Biol.* **18**, 159–67.
- 631 **Immonen, E. and Ritchie, M. G.** (2012). The genomic response to courtship song stimulation in  
632 female *Drosophila melanogaster*. *Proc. R. Soc. B* **279**, 1359–1365.
- 633 **Jacobs, M. E.** (1960). Influence of Light on Mating of *Drosophila Melanogaster*. *Ecology* **41**, 182–

- 634 188.
- 635 **Joëls, M.** (2006). Corticosteroid effects in the brain: U-shape it. *Trends Pharmacol. Sci.* **27**, 244–250.
- 636 **Katsouni, E., Zarros, A., Skandali, N., Tsakiris, S. and Lappas, D.** (2013). The role of  
637 cholecystokinin in the induction of aggressive behavior: A focus on the available experimental  
638 data (review). *Acta Physiol. Hung.* **100**, 361–377.
- 639 **Kayser, M. S., Mainwaring, B., Yue, Z. and Sehgal, A.** (2015). Sleep deprivation suppresses  
640 aggression in *Drosophila*. *Elife* **4**, 1–15.
- 641 **Kim, Y.-K., Saver, M., Simon, J., Kent, C. F., Shao, L., Eddison, M., Agrawal, P., Texada, M.,**  
642 **Truman, J. W. and Heberlein, U.** (2018). Repetitive aggressive encounters generate a long-  
643 lasting internal state in *Drosophila melanogaster* males. *Proc. Natl. Acad. Sci.* **115**, 1099–1104.
- 644 **Koganezawa, M., Kimura, K. and Yamamoto, D.** (2016). The Neural Circuitry that Functions as a  
645 Switch for Courtship versus Aggression in *Drosophila* Males. *Curr. Biol.* **26**, 1395–1403.
- 646 **Kohn, M. C. and Melnick, R. L.** (2002). Biochemical origins of the non-monotonic receptor-mediated  
647 dose-response. *J. Mol. Endocrinol.* **29**, 113–123.
- 648 **Kõks, S., Soosaar, A., Võikar, V., Bourin, M. and Vasar, E.** (1999). BOC-CCK-4, CCK(B) receptor  
649 agonist, antagonizes anxiolytic-like action of morphine in elevated plus-maze. *Neuropeptides* **33**,  
650 63–69.
- 651 **Kravitz, E. A. and Fernandez, M. de la P.** (2015). Aggression in *Drosophila*. *Behav. Neurosci.* **129**,  
652 549–563.
- 653 **Kravitz, E. a and Huber, R.** (2003). Aggression in invertebrates. *Curr. Opin. Neurobiol.* **13**, 736–743.

- 654 **Kruk, M. R., Van der Laan, C. E., Mos, J., Van der Poel, a M., Meelis, W. and Olivier, B.** (1984).  
655 Comparison of aggressive behaviour induced by electrical stimulation in the hypothalamus of  
656 male and female rats. *Prog. Brain Res.* **61**, 303–14.
- 657 **Kubiak, T. M., Larsen, M. J., Burton, K. J., Bannow, C. a, Martin, R. a, Zantello, M. R. and**  
658 **Lowery, D. E.** (2002). Cloning and functional expression of the first *Drosophila melanogaster*  
659 sulfakinin receptor DSK-R1. *Biochem. Biophys. Res. Commun.* **291**, 313–20.
- 660 **Kulkosky, P. J., Breckenridge, C., Krinsky, R. and Woods, S. C.** (1976). Satiety elicited by the C-  
661 terminal octapeptide of cholecystokinin-pancreozymin in normal and VMH-lesioned rats. *Behav.*  
662 *Biol.* **18**, 227–234.
- 663 **Larter, N. K., Sun, J. S. and Carlson, J. R.** (2016). Organization and function of *Drosophila* odorant  
664 binding proteins. *Elife* **5**, e20242.
- 665 **Laughlin, J. D., Ha, T. S., Jones, D. N. M. and Smith, D. P.** (2008). Activation of Pheromone-  
666 Sensitive Neurons Is Mediated by Conformational Activation of Pheromone-Binding Protein. *Cell*  
667 **133**, 1255–1265.
- 668 **Leng, N., Dawson, J. A., Thomson, J. A., Ruotti, V., Rissman, A. I., Smits, B. M. G., Haag, J. D.,**  
669 **Gould, M. N., Stewart, R. M. and Kendzierski, C.** (2013). EBSeq: An empirical Bayes  
670 hierarchical model for inference in RNA-seq experiments. *Bioinformatics* **29**, 1035–1043.
- 671 **Li, Q., Deng, X. and Singh, P.** (2007). Significant increase in the aggressive behavior of transgenic  
672 mice overexpressing peripheral progastrin peptides: Associated changes in CCK2 and serotonin  
673 receptors in the CNS. *Neuropsychopharmacology* **32**, 1813–1821.
- 674 **Lin, D., Boyle, M. P., Dollar, P., Lee, H., Lein, E. S., Perona, P. and Anderson, D. J.** (2011).

- 675 Functional identification of an aggression locus in the mouse hypothalamus. *Nature* **470**, 221–  
676 226.
- 677 **Lipp, H. P. and Hunsperger, R. W.** (1978). Threat, Attack and Flight Elicited by Electrical  
678 Stimulation of the Ventromedial Hypothalamus of the Marmoset Monkey *Callithrix jacchus*; pp.  
679 260–275. *Brain. Behav. Evol.* **15**, 260–275.
- 680 **Liu, W., Liang, X., Gong, J., Yang, Z., Zhang, Y., Zhang, J.-X. and Rao, Y.** (2011). Social  
681 regulation of aggression by pheromonal activation of Or65a olfactory neurons in *Drosophila*. *Nat.*  
682 *Neurosci.* **14**, 896–902.
- 683 **Love, M. I., Huber, W. and Anders, S.** (2014). Moderated estimation of fold change and dispersion  
684 for RNA-seq data with DESeq2. *Genome Biol.* **15**, 1–21.
- 685 **Luciano, D. and Lore, R.** (1975). Aggression and social experience in domesticated rats. *J. Comp.*  
686 *Physiol. Psychol.* **88**, 917–923.
- 687 **Luo, J., Lushchak, O. V., Goergen, P., Williams, M. J. and Nassel, D. R.** (2014). *Drosophila*  
688 insulin-producing cells are differentially modulated by serotonin and octopamine receptors and  
689 affect social behavior. *PLoS One* **9**, e99732.
- 690 **Ma, X. cang, Jiang, D., Jiang, W. hui, Wang, F., Jia, M., Wu, J., Hashimoto, K., Dang, Y. hui and**  
691 **Gao, C. ge** (2011). Social isolation-induced aggression potentiates anxiety and depressive-like  
692 behavior in male mice subjected to unpredictable chronic mild stress. *PLoS One* **6**, e20955.
- 693 **Mattaliano, M. D., Montana, E. S., Parisky, K. M., Littleton, J. T. and Griffith, L. C.** (2007). The  
694 *Drosophila* ARC homolog regulates behavioral responses to starvation. *Mol. Cell. Neurosci.* **36**,  
695 211–221.

- 696 **Mohorianu, I., Bretman, A., Smith, D. T., Fowler, E. K., Dalmay, T. and Chapman, T. (2017).**  
697 Genomic responses to the socio-sexual environment in male *Drosophila melanogaster* exposed to  
698 conspecific rivals. *RNA* **23**, 1048–1059.
- 699 **Monte-Silva, K., Kuo, M.-F., Thirugnanasambandam, N., Liebetanz, D., Paulus, W. and Nitsche,**  
700 **M. A. (2009).** Dose-Dependent Inverted U-Shaped Effect of Dopamine (D2-Like) Receptor  
701 Activation on Focal and Nonfocal Plasticity in Humans. *J. Neurosci.* **29**, 6124–6131.
- 702 **Nagarkar-Jaiswal, S., Lee, P. T., Campbell, M. E., Chen, K., Anguiano-Zarate, S., Gutierrez, M.**  
703 **C., Busby, T., Lin, W. W., He, Y., Schulze, K. L., et al. (2015).** A library of MiMICs allows  
704 tagging of genes and reversible, spatial and temporal knockdown of proteins in *Drosophila*. *Elife*  
705 e05338.
- 706 **Nichols, R. (1992).** Isolation and expression of the *Drosophila* drosulfakinin neural peptide gene  
707 product, DSK-I. *Mol. Cell. Neurosci.* **3**, 342–347.
- 708 **Nichols, R. and Lim, I. a. (1996).** Spatial and temporal immunocytochemical analysis of drosulfakinin  
709 (Dsk) gene products in the *Drosophila melanogaster* central nervous system. *Cell Tissue Res.* **283**,  
710 107–116.
- 711 **Nichols, R., Schneuwly, S. A. and Dixon, J. E. (1988).** Identification and characterization of a  
712 *Drosophila* homologue to the vertebrate neuropeptide cholecystokinin. *J. Biol. Chem.* **263**, 12167–  
713 12170.
- 714 **Nilsen, S. P., Chan, Y.-B., Huber, R. and Kravitz, E. A. (2004).** Gender-selective patterns of  
715 aggressive behavior in *Drosophila melanogaster*. *Proc. Natl. Acad. Sci. U.S.A.* **101**, 12342–12347.
- 716 **Nitabach, M. N. (2006).** Electrical Hyperexcitation of Lateral Ventral Pacemaker Neurons

- 717 Desynchronizes Downstream Circadian Oscillators in the Fly Circadian Circuit and Induces  
718 Multiple Behavioral Periods. *J. Neurosci.* **26**, 479–489.
- 719 **Panksepp, J., Burgdorf, J., Beinfeld, M. C., Kroes, R. A. and Moskal, J. R.** (2004). Regional brain  
720 cholecystokinin changes as a function of friendly and aggressive social interactions in rats. *Brain*  
721 *Res.* **1025**, 75–84.
- 722 **Perkins, L. A., Holderbaum, L., Tao, R., Hu, Y., Sopko, R., McCall, K., Yang-Zhou, D.,**  
723 **Flockhart, I., Binari, R., Shim, H. S., et al.** (2015). The transgenic RNAi project at Harvard  
724 medical school: Resources and validation. *Genetics* **201**, 843–852.
- 725 **Pfeiffer, B. D., Truman, J. W. and Rubin, G. M.** (2012). Using translational enhancers to increase  
726 transgene expression in *Drosophila*. *Proc. Natl. Acad. Sci.* **109**, 6626–6631.
- 727 **Powell, N. D., Sloan, E. K., Bailey, M. T., Arevalo, J. M. G., Miller, G. E., Chen, E., Kobor, M. S.,**  
728 **Reader, B. F., Sheridan, J. F. and Cole, S. W.** (2013). Social stress up-regulates inflammatory  
729 gene expression in the leukocyte transcriptome via  $\alpha$ -adrenergic induction of myelopoiesis. *Proc.*  
730 *Natl. Acad. Sci.* **110**, 16574–16579.
- 731 **Qi, Y., Fu, M. and Herzog, H.** (2016). Y2 receptor signalling in NPY neurons controls bone  
732 formation and fasting induced feeding but not spontaneous feeding. *Neuropeptides* **55**, 91–97.
- 733 **Ravi, P., Trivedi, D. and Hasan, G.** (2018). FMRFa receptor stimulated Ca<sup>2+</sup> signals alter the activity  
734 of flight modulating central dopaminergic neurons in *Drosophila melanogaster*. *PLoS Genet.* **14**,  
735 1–25.
- 736 **Robinson, M. D., McCarthy, D. J. and Smyth, G. K.** (2010). edgeR: a Bioconductor package for  
737 differential expression analysis of digital gene expression data. *Bioinformatics* **26**, 139–140.



- 738 **Rulifson, E. J.** (2002). Ablation of Insulin-Producing Neurons in Flies: Growth and Diabetic  
739 Phenotypes. *Science*. **296**, 1118–1120.
- 740 **Shao, L., Saver, M., Chung, P., Ren, Q., Lee, T. and Kent, C. F.** (2017). Dissection of the  
741 *Drosophila* neuropeptide F circuit using a high-throughput two-choice assay. *Proc. Natl. Acad.*  
742 *Sci. U.S.A.* E8091–E8099.
- 743 **Söderberg, J. A. E., Carlsson, M. A. and Nässel, D. R.** (2012). Insulin-producing cells in the  
744 *Drosophila* brain also express satiety-inducing cholecystokinin-like peptide, drosulfakinin. *Front.*  
745 *Endocrinol. (Lausanne)*. **3**, 1–13.
- 746 **Tauber, M.** (2010). Molecular Genetics of Aggressive Behaviour in *Drosophila melanogaster*. *PhD*  
747 *thesis* University of Leicester, UK.
- 748 **Terhzaz, S., Rosay, P., Goodwin, S. F. and Veenstra, J. A.** (2007). The neuropeptide SIFamide  
749 modulates sexual behavior in *Drosophila*. *Biochem. Biophys. Res. Commun.* **352**, 305–310.
- 750 **Thomas, A. L., Davis, S. M. and Dierick, H. A.** (2015). Of Fighting Flies, Mice, and Men: Are Some  
751 of the Molecular and Neuronal Mechanisms of Aggression Universal in the Animal Kingdom?  
752 *PLoS Genet.* **11**, 1–14.
- 753 **Tõru, I., Aluoja, A., Võhma, Ü.; Raag, M., Vasar, V., Maron, E. and Shlik, J.** (2010). Associations  
754 between personality traits and CCK-4-induced panic attacks in healthy volunteers. *Psychiatry Res.*  
755 **178**, 342–347.
- 756 **Toth, M., Fuzesi, T., Halasz, J., Tulogdi, A. and Haller, J.** (2010). Neural inputs of the hypothalamic  
757 “aggression area” in the rat. *Behav. Brain Res.* **215**, 7–20.

- 758 **Vaccarino, F. J.** (1994). Nucleus accumbens dopamine-CCK interactions in psychostimulant reward  
759 and related behaviors. *Neurosci. Biobehav. Rev.* **18**, 207–214.
- 760 **Vasar, E., Peuranen, E., Harro, J., Lang, A. and Oreland, L.** (1993). Social isolation of rats  
761 increases the density of cholecystokinin receptors in the frontal cortex and abolishes the anti-  
762 exploratory effect of caerulein. *Arch. Pharmacol.* **348**, 96–101.
- 763 **Wallace, D. L., Han, M.-H., Graham, D. L., Green, T. a, Vialou, V., Iñiguez, S. D., Cao, J.-L.,**  
764 **Kirk, A., Chakravarty, S., Kumar, A., et al.** (2009). CREB regulation of nucleus accumbens  
765 excitability mediates social isolation-induced behavioral deficits. *Nat. Neurosci.* **12**, 200–9.
- 766 **Wang, L. and Anderson, D. J.** (2010). Identification of an aggression-promoting pheromone and its  
767 receptor neurons in *Drosophila*. *Nature* **463**, 227–31.
- 768 **Wang, L., Dankert, H., Perona, P. and Anderson, D. J.** (2008). A common genetic target for  
769 environmental and heritable influences on aggressiveness in *Drosophila*. *Proc. Natl. Acad. Sci. U.*  
770 *S. A.* **105**, 5657–5663.
- 771 **Wen, T., Parrish, C. a, Xu, D., Wu, Q. and Shen, P.** (2005). *Drosophila* neuropeptide F and its  
772 receptor, NPFR1, define a signaling pathway that acutely modulates alcohol sensitivity. *Proc.*  
773 *Natl. Acad. Sci. U. S. A.* **102**, 2141–6.
- 774 **Williams, M. J., Goergen, P., Rajendran, J., Klockars, A., Kasagiannis, A., Fredriksson, R. and**  
775 **Schiöth, H. B.** (2014). Regulation of aggression by obesity-linked genes TfAP-2 and Twz through  
776 octopamine signaling in *Drosophila*. *Genetics* **196**, 349–362.
- 777 **Wolfner, M. F.** (2003). Sex determination: Sex on the brain? *Curr. Biol.* **13**, 103–105.

Dsk mediated *Drosophila* aggression

- 778 **Zhou, C., Rao, Y. and Rao, Y.** (2008). A subset of octopaminergic neurons are important for  
779 *Drosophila* aggression. *Nat. Neurosci.* **11**, 1059–67.
- 780 **Zwanzger, P., Domschke, K. and Bradwejn, J.** (2012). Neuronal network of panic disorder: The role  
781 of the neuropeptide cholecystokinin. *Depress. Anxiety* **29**, 762–774.
- 782
